# Supplementary material for: Delivery mode for prolonged, obstructed labour resulting in obstetric fistula: a retrospective review of 4396 women in East and Central Africa
Source: PubMed Central journal article supplement (PMC7187175; doi:10.1111/1471-0528.16047), 2020-01-02
Supplement: BJO-127-702-s001.pdf [file BJO-127-702-s001.pdf]

**Table S1.** Country where women sought fistula treatment

| <b>Country</b> | <b>Frequency</b> | <b>Percent of sample</b> |
|----------------|------------------|--------------------------|
| Tanzania       | 1,587            | 36.1                     |
| Uganda         | 994              | 22.6                     |
| Kenya          | 678              | 15.4                     |
| Malawi         | 428              | 9.7                      |
| Rwanda         | 297              | 6.8                      |
| Somalia        | 145              | 3.3                      |
| South Sudan    | 98               | 2.2                      |
| Zambia         | 113              | 2.6                      |
| Ethiopia       | 56               | 1.3                      |
| <b>Total</b>   | <b>4,396</b>     | <b>100.0</b>             |
